# Supplementary material
Source: PubMed Central journal article supplement (PMC3224983)

## Supplementary Table 1

### Reagent panel used for flow cytometric analysis

|                                     | Specificity   | Fluorochrome  |
|-------------------------------------|---------------|---------------|
| <i>T-cell lineage</i>               | CD3           | APC-Cy7       |
|                                     | CD4           | QD655         |
|                                     | CD8           | QD585         |
| <i>Cytokines</i>                    | IFN- $\gamma$ | Ax594         |
|                                     | IL-2          | APC           |
|                                     | TNF           | PE-Cy7        |
| <i>Differentiation / Activation</i> | CCR7          | Ax680         |
|                                     | CD27          | Bi / SA-QD605 |
|                                     | CD28          | PE-Cy5        |
|                                     | CD45RO        | QD545         |
|                                     | CD57          | QD705         |
|                                     | CD127         | PE-Cy5.5      |
|                                     | Granzyme B    | PE            |
|                                     | Ki67          | FITC          |
| <i>Dump</i>                         | Dead cells    | ViViD         |
|                                     | CD14          | PacBlu        |
|                                     | CD19          | PacBlu        |

APC – allophycocyanin; Cy – cyanine; QD – quantum dot; Ax – alexa; PE – R-phycoerythrin; Bi – biotin; SA – streptavidin; FITC – fluorescein isothiocyanate; ViViD – LIVE/DEAD fixable violet dead cell stain; PacBlu – pacific blue.

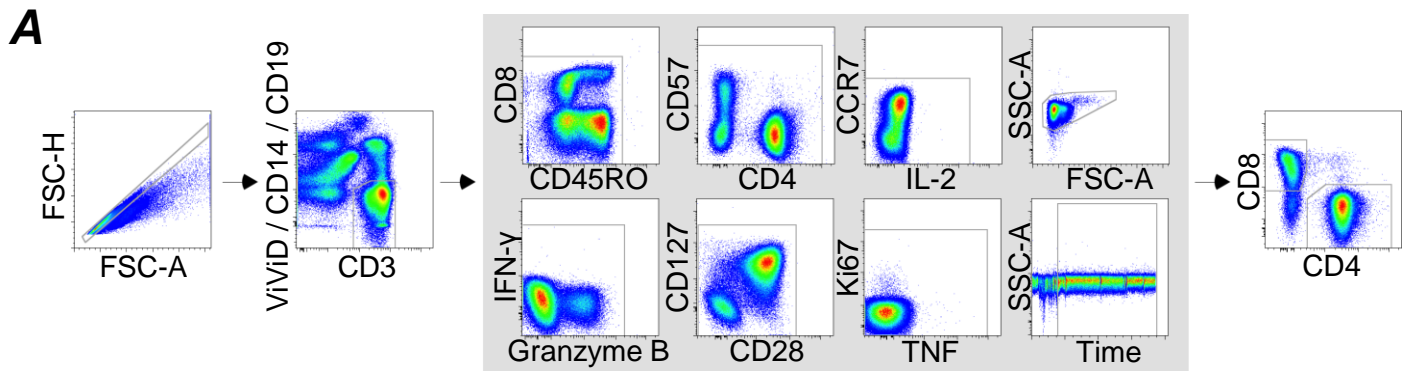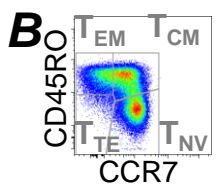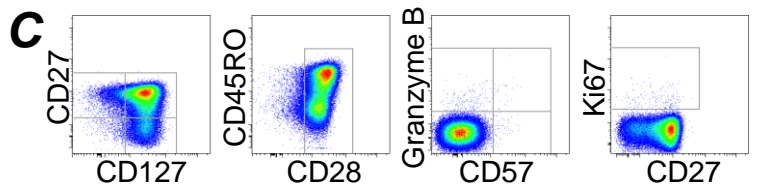

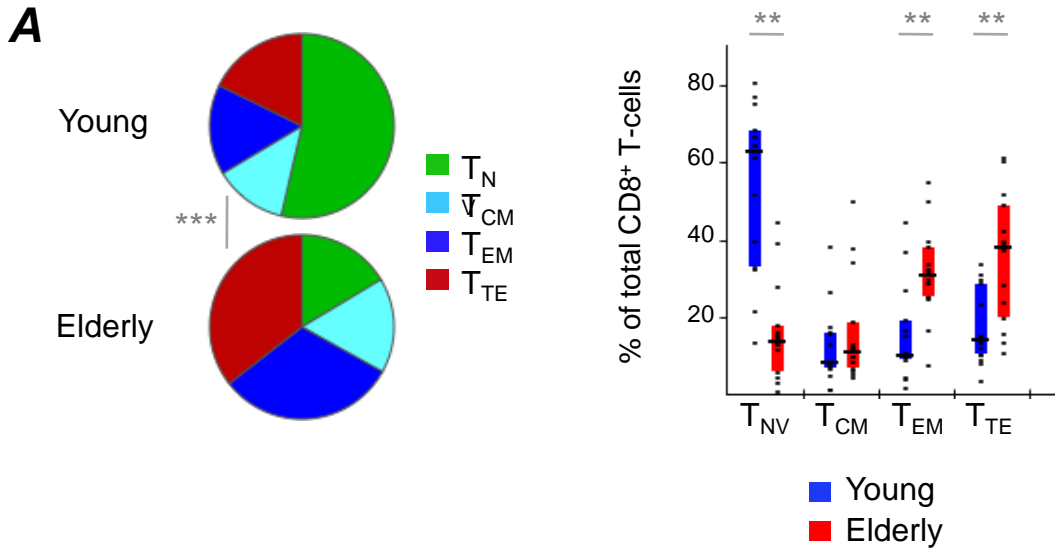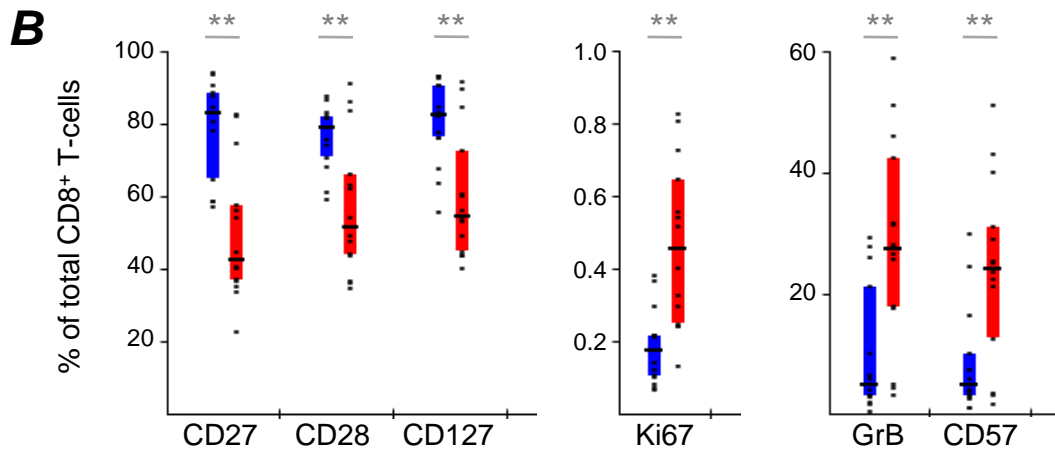

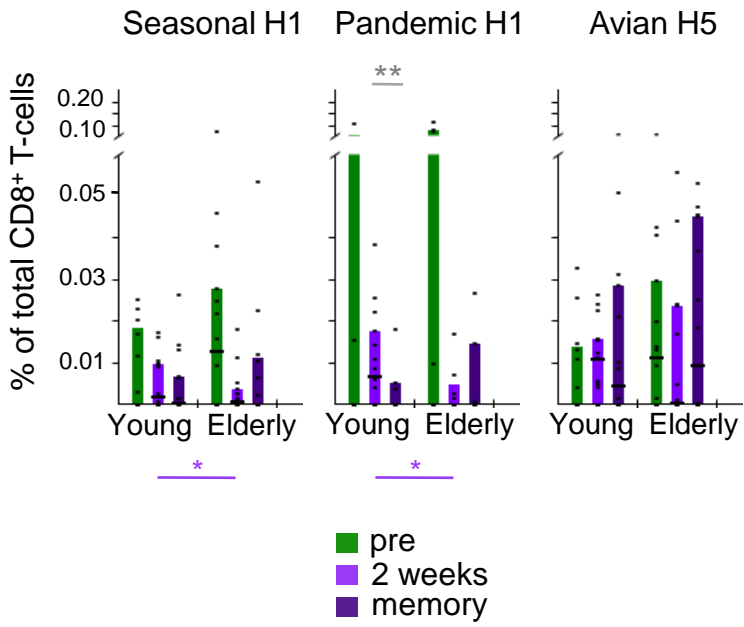

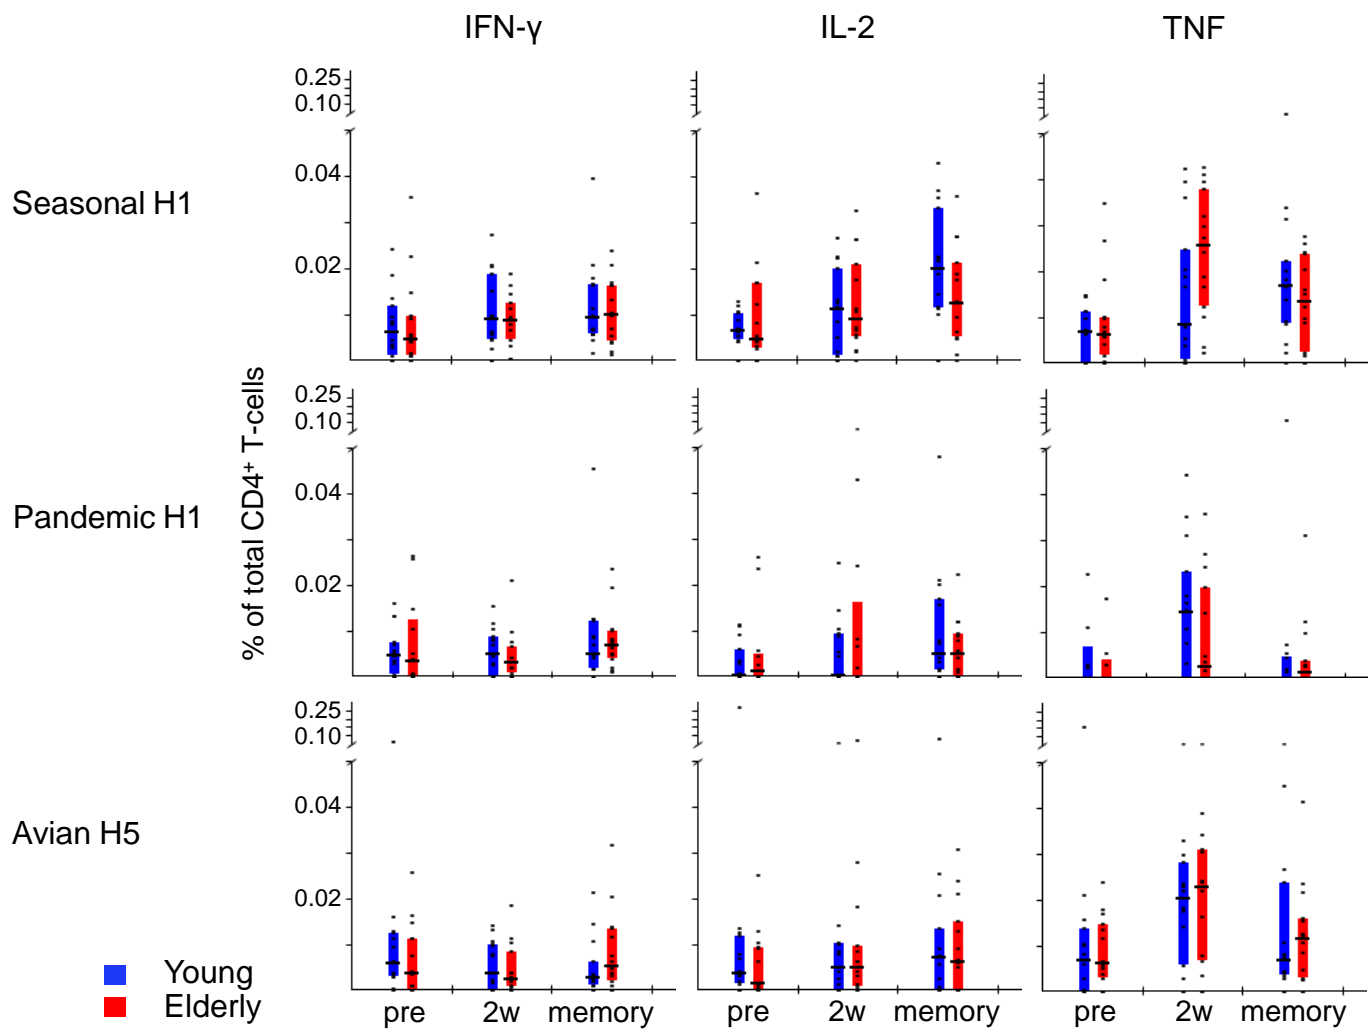

Supplement: NIHMS329498-supplement-01.pdf [file NIHMS329498-supplement-01.pdf]
